# Supplementary material
Source: PubMed Central journal article supplement (PMC4460511)
Supplement: pnas.201411254SI.pdf [file pnas.201411254SI.pdf]

# Supporting Information

Plasschaert and Bartolomei 10.1073/pnas.1411254111

**Table S1. List of Grb10 protein partners and their functions**

| Protein partner/kinase | Molecular functions                                   | Associated physiological functions                                                         | Model system in which Grb10 interaction was defined | Refs.   |
|------------------------|-------------------------------------------------------|--------------------------------------------------------------------------------------------|-----------------------------------------------------|---------|
| GAB1                   | Adapter molecule and scaffold                         | Tubulogenesis, cell proliferation, growth, apoptosis                                       | NIH 3T3 (mouse)                                     | (1)     |
| GIGYF2                 | Unknown; putative transcription factor                | Motor neuron survival, insulin signaling                                                   | R+ fibroblast (mouse)                               | (2)     |
| GIGYF1                 | Unknown; putative transcription factor                | Insulin signaling                                                                          | R+ fibroblast (mouse)                               | (2)     |
| AKT                    | Serine/threonine kinase; Grb10 kinase                 | Cell survival, cell cycle regulation, metabolism, angiogenesis                             | COS-1 (primate)                                     | (3)     |
| TEC                    | Tyrosine kinase                                       | Cell proliferation, hematopoiesis                                                          | HEK293 (human)                                      | (4)     |
| P85                    | PI3 kinase                                            | Cell growth, proliferation, motility, insulin signaling                                    | HIRcB (Rat)                                         | (5)     |
| 14-3-3                 | Adapter molecule and scaffold                         | Apoptosis, cell cycle control, proliferation, insulin signaling                            | COS-1 (primate)                                     | (6)     |
| NEDD4                  | E3-ubiquitin ligase                                   | Neurite development, kidney function, angiogenesis, insulin signaling                      | HUVEC (human)                                       | (7)     |
| MEK1                   | Kinase; component of MAPK/ERK pathway                 | General growth and development, insulin signaling, apoptosis                               | HEK293 (human)                                      | (8)     |
| RPTOR                  | Adapter protein in mTOR pathway                       | Early development, insulin signaling, cell proliferation and general growth                | HEK293 (human)                                      | (9, 10) |
| RAF1                   | MAP3K; part of the MAPK/ERK pathway                   | General growth and development, insulin signaling, apoptosis                               | HEK293 (human)                                      | (8)     |
| EPBH1 (ELK)            | Ephrin receptor; tyrosine kinase                      | Axonal guidance, neuronal bundling, angiogenesis                                           | HRMCs (human)                                       | (11)    |
| IGF1R                  | Receptor for IGF1; tyrosine kinase                    | General growth and metabolism, insulin signaling                                           | NWTb3 (human)                                       | (12)    |
| INSR                   | Receptor for insulin, IGF1, IGF-2; tyrosine kinase    | General growth and metabolism, insulin signaling                                           | Numerous                                            | (13)    |
| VEGFR-2                | VEGF receptor; tyrosine kinase                        | Cell proliferation, angiogenesis; hematopoiesis                                            | HEK293 (human)                                      | (14)    |
| FLT3                   | Receptor tyrosine kinase                              | Cell proliferation, differentiation, hematopoiesis                                         | COS-1 (primate)                                     | (15)    |
| KIT                    | Receptor for stem cell factor (SCF); tyrosine kinase  | Includes cell survival, proliferation, differentiation, hematopoiesis, germ cell function, | Mo7e (human)                                        | (3)     |
| PDGFR $\beta$          | PDGF receptor; tyrosine kinase                        | Mesenchymal development and proliferation, neuronal myelination                            | NIH 3T3 (mouse)                                     | (16)    |
| EGFR                   | Receptor for EGF ligands; tyrosine kinase             | Cell differentiation and proliferation                                                     | NWTb3 (human)                                       | (12)    |
| JAK2                   | Nonreceptor tyrosine kinase                           | Cell proliferation and hematopoiesis                                                       | HEK293 (human)                                      | (17)    |
| RET                    | GDNF receptor; tyrosine kinase                        | Enteric nervous system and kidney development                                              | HEK293 (human)                                      | (18)    |
| GH                     | Transmembrane receptor for growth hormone             | General growth                                                                             | HUH-7 (human)                                       | (17)    |
| NRAS                   | Small GTPase                                          | General growth, cell division                                                              | HEK293 (human)                                      | (19)    |
| MAP3K14 (NIK)          | Kinase; part of noncanonical NF- $\kappa$ B signaling | Immune cell growth and function                                                            | HEK293 (human)                                      | (20)    |
| LRP6                   | Coreceptor; part of WNT signaling                     | General growth and proliferation, skeletal and teeth development                           | HEK293 (human)                                      | (21)    |
| MET                    | HGF receptor; tyrosine kinase                         | Includes proliferation, morphogenesis, wound healing                                       | CHO (hamster)                                       | (16)    |
| BCL2L11 (BIM/ BILM)    | Scaffold protein                                      | Proapoptotic factor, normal development                                                    | HEK293 (human)                                      | (22)    |
| RQCD1                  | Coactivator; scaffold for GIGYF1/2-Grb10 interaction  | Neuronal differentiation, general growth, development                                      | HeLa (human)                                        | (23)    |

Table S1. Cont.

| Protein partner/kinase | Molecular functions                      | Associated physiological functions                                                 | Model system in which Grb10 interaction was defined | Refs.   |
|------------------------|------------------------------------------|------------------------------------------------------------------------------------|-----------------------------------------------------|---------|
| MAPK1                  | Serine/threonine kinase; kinase of Grb10 | Cell proliferation, transcriptional regulation, general growth and development     | CHO (hamster)                                       | (24)    |
| SRC                    | Tyrosine kinase; kinase of Grb10         | Proliferation, angiogenesis, cell invasion                                         | CHO (hamster)                                       | (25)    |
| FYN                    | Tyrosine kinase; kinase of Grb10         | Axon guidance, cell proliferation, cell cycle regulation, neuronal differentiation | CHO (hamster)                                       | (25)    |
| MTOR                   | Serine/threonine kinase; kinase of Grb10 | Cell proliferation, transcription, cell synthesis                                  | MEF (mouse)                                         | (9, 10) |

- Deng Y, Zhang M, Riedel H (2008) Mitogenic roles of Gab1 and Grb10 as direct cellular partners in the regulation of MAP kinase signaling. *J Cell Biochem* 105(5):1172–1182.
- Giovannone B, et al. (2003) Two novel proteins that are linked to insulin-like growth factor (IGF-I) receptors by the Grb10 adapter and modulate IGF-I signaling. *J Biol Chem* 278(34):31564–31573.
- Jahn T, Seipel P, Urschel S, Peschel C, Duyster J (2002) Role for the adaptor protein Grb10 in the activation of Akt. *Mol Cell Biol* 22(4):979–991.
- Mano H, et al. (1998) Grb10/Grb1R as an in vivo substrate of Tec tyrosine kinase. *Genes Cells* 3(7):431–441.
- Deng Y, et al. (2003) Growth factor receptor-binding protein 10 (Grb10) as a partner of phosphatidylinositol 3-kinase in metabolic insulin action. *J Biol Chem* 278(41):39311–39322.
- Urschel S, et al. (2005) Phosphorylation of grb10 regulates its interaction with 14-3-3. *J Biol Chem* 280(17):16987–16993.
- Murdaca J, et al. (2004) Grb10 prevents Nedd4-mediated vascular endothelial growth factor receptor-2 degradation. *J Biol Chem* 279(25):26754–26761.
- Nantel A, Mohammad-Ali K, Sherk J, Posner BI, Thomas DY (1998) Interaction of the Grb10 adapter protein with the Raf1 and MEK1 kinases. *J Biol Chem* 273(17):10475–10484.
- Yu Y, et al. (2011) Phosphoproteomic analysis identifies Grb10 as an mTORC1 substrate that negatively regulates insulin signaling. *Science* 332(6035):1322–1326.
- Liu M, et al. (2014) Grb10 promotes lipolysis and thermogenesis by phosphorylation-dependent feedback inhibition of mTORC1. *Cell Metab* 19(6):967–980.
- Stein E, Cerretti DP, Daniel TO (1996) Ligand activation of ELK receptor tyrosine kinase promotes its association with Grb10 and Grb2 in vascular endothelial cells. *J Biol Chem* 271(38):23588–23593.
- He W, Rose DW, Olefsky JM, Gustafson TA (1998) Grb10 interacts differentially with the insulin receptor, insulin-like growth factor I receptor, and epidermal growth factor receptor via the Grb10 Src homology 2 (SH2) domain and a second novel domain located between the pleckstrin homology and SH2 domains. *J Biol Chem* 273(12):6860–6867.
- Liu F, Roth RA (1995) Grb-IR: A SH2-domain-containing protein that binds to the insulin receptor and inhibits its function. *Proc Natl Acad Sci USA* 92(22):10287–10291.
- Giorgetti-Peraldi S, Murdaca J, Mas JC, Van Obberghen E (2001) The adapter protein, Grb10, is a positive regulator of vascular endothelial growth factor signaling. *Oncogene* 20(30):3959–3968.
- Kazi JU, Rönstrand L (2013) FLT3 signals via the adapter protein Grb10 and overexpression of Grb10 leads to aberrant cell proliferation in acute myeloid leukemia. *Mol Oncol* 7(3):402–418.
- Wang J, et al. (1999) Grb10, a positive, stimulatory signaling adapter in platelet-derived growth factor BB-, insulin-like growth factor I-, and insulin-mediated mitogenesis. *Mol Cell Biol* 19(9):6217–6228.
- Moutoussamy S, Renaudie F, Lago F, Kelly PA, Finidori J (1998) Grb10 identified as a potential regulator of growth hormone (GH) signaling by cloning of GH receptor target proteins. *J Biol Chem* 273(26):15906–15912.
- Pandey A, Duan H, Di Fiore PP, Dixit VM (1995) The Ret receptor protein tyrosine kinase associates with the SH2-containing adapter protein Grb10. *J Biol Chem* 270(37):21461–21463.
- Depetris RS, Wu J, Hubbard SR (2009) Structural and functional studies of the Ras-associating and pleckstrin-homology domains of Grb10 and Grb14. *Nat Struct Mol Biol* 16(8):833–839.
- Chen D, et al. (2003) NIK is a component of the EGF/herectin receptor signaling complexes. *Oncogene* 22(28):4348–4355.
- Tezuka N, Brown AMC, Yanagawa S (2007) GRB10 binds to LRP6, the Wnt co-receptor and inhibits canonical Wnt signaling pathway. *Biochem Biophys Res Commun* 356(3):648–654.
- Hu Z-Q, et al. (2010) Grb10 interacts with Bim L and inhibits apoptosis. *Mol Biol Rep* 37(7):3547–3552.
- Ajiro M, Nishidate T, Katagiri T, Nakamura Y (2010) Critical involvement of RQCD1 in the EGFR-Akt pathway in mammary carcinogenesis. *Int J Oncol* 37(5):1085–1093.
- Langlais P, et al. (2005) Phosphorylation of Grb10 by mitogen-activated protein kinase: Identification of Ser150 and Ser476 of human Grb10 $\zeta$  as major phosphorylation sites. *Biochemistry* 44(24):8890–8897.
- Langlais P, Dong LQ, Hu D, Liu F (2000) Identification of Grb10 as a direct substrate for members of the Src tyrosine kinase family. *Oncogene* 19(25):2895–2903.

**Table S2. Expression and ChIP-qPCR primers**

| Primer           | Sequence                 | Use                                                        |
|------------------|--------------------------|------------------------------------------------------------|
| Grb101AF_qPCR    | CACGAGTCACAACGGAGAAA     | qPCR primer for major isoform of <i>Grb10</i>              |
| Grb101AR_qPCR    | CACGGGAGCACGAAGTTT       | qPCR primer for major isoform of <i>Grb10</i>              |
| Grb101BF_qPCR    | CTCAGAAAAAGGGCTCTGGA     | qPCR primer for neuron-specific isoform for <i>Grb10</i>   |
| Grb101BR_qPCR    | AGTGTGGCGCATGTAACAC      | qPCR primer for neuron-specific isoform for <i>Grb10</i>   |
| Grb101AF         | GAGCACGAAGTTCCGCGCAC     | PCR primer for major isoform of <i>Grb10</i>               |
| Grb101BF         | GTC AATTCCCTGGAAGCTGAGAA | PCR primer for neuron-specific isoform of <i>Grb10</i>     |
| Grb101CF         | ATCGCCATCTACAGTTTCTG     | PCR primer for neuron/embryonic isoform of <i>Grb10</i>    |
| Grb104R          | CTTGGCAGGTGGCTGGCTCGG    | Reverse PCR primer for <i>Grb10</i> expression             |
| NonoF_qPCR       | GTCCTGTGAGAAGCTGGAGAT    | qPCR primer for housekeeping gene <i>Nono</i>              |
| NonoR_qPCR       | TTCTTGACGTCTCATCAAATCC   | qPCR primer for housekeeping gene <i>Nono</i>              |
| GusbF_qPCR       | CTCTGGTGGCCTTACCTGAT     | qPCR primer for housekeeping gene <i>ArpO</i>              |
| GusbR_qPCR       | TCAGTTGTTGTCACCTTCACCT   | qPCR primer for housekeeping gene <i>ArpO</i>              |
| Hsp90ab1F_qPCR   | CGCAAGAACATCGTCAAGAA     | qPCR primer for housekeeping gene <i>Gapdh</i>             |
| Hsp90ab1R_qPCR   | GG AATCTTCATGAATTCCAAGC  | qPCR primer for housekeeping gene <i>Gapdh</i>             |
| Hb9F_qPCR        | CCAAGATGCCGGACTTCA       | qPCR primer for motor neuron marker <i>Hb9</i>             |
| Hb9R_qPCR        | TTGAGCTTGAAGTGGTGTTCC    | qPCR primer for motor neuron marker <i>Hb9</i>             |
| Grb10_AS_F       | TGACAACAGCTGGACTCTGG     | Primer used for allele-specific expression of <i>Grb10</i> |
| Grb10_AS_R       | TCTTCCAAGACTTGCGTCCT     | Primer used for allele-specific expression of <i>Grb10</i> |
| Grb10_ICR_qPCR_F | GTGAACCCTTCCAAACGAC      | Primer for CTCF ChIP at the <i>Grb10</i> ICR               |
| Grb10_ICR_qPCR_R | GTGTGGCGAAGTCTGTGCTA     | Primer for CTCF ChIP at the <i>Grb10</i> ICR               |
